# Supplementary material
Source: PubMed Central journal article supplement (PMC2668542)
Supplement: NIHMS101819-supplement-1_si_001.pdf [file NIHMS101819-supplement-1_si_001.pdf]

SUPPORTING INFORMATION

# Tailoring the Structure of Nanopyramids for Optimal Heat Generation

*Warefta Hasan, † Christopher L. Stender, † Min Hyung Lee, † Colleen L. Nehl, † Jeunghoon*

*Lee,<sup>+</sup> and Teri W. Odom<sup>†,‡,\*</sup>*

†Department of Chemistry, ‡Department of Materials Science and Engineering, Northwestern

University, 2145 Sheridan Road, Evanston, Illinois 60208-3113

+ Present address: Department of Chemistry and Biochemistry, Boise State University, 1910

University Drive, Boise, ID 83725-1520

\* To whom correspondence should be addressed. E-mail: [todom@northwestern.edu](mailto:todom@northwestern.edu).

Telephone number: 847-491-7674

Fax number: 847-491-7713

Email address: [todom@northwestern.edu](mailto:todom@northwestern.edu)

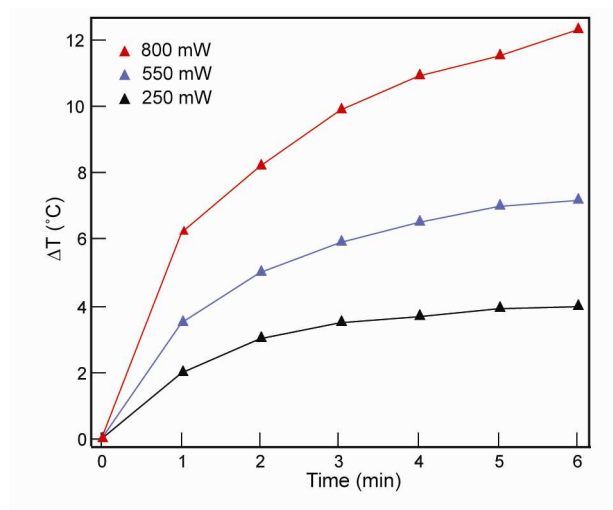

**Fig. S1.** Photothermal response of thin nanopyramids with tips (WT 20) under different laser excitation powers.

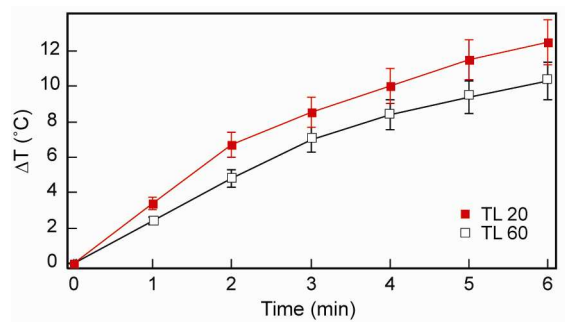

**Fig. S2. Effect of shell thickness on the photothermal response.** Temperature increase of suspension of TL 20 and TL 60 nanopyrramids containing the same amount of Au (0.6 ppm).
